# Supplementary material for: Label-free impedance flow cytometry for nanotoxicity screening
Source: PubMed Central journal article supplement (PMC6954202; doi:10.1038/s41598-019-56705-3), 2020-01-10
Supplement: 41598_2019_56705_MOESM1_ESM.pdf [file 41598_2019_56705_MOESM1_ESM.pdf]

1 **Supplementary Information**

2

3

4

5 **Label-free impedance flow cytometry for nanotoxicity screening**

6

7

8

Melanie Ostermann<sup>1</sup>, [melanie.ostermann@uib.no](mailto:melanie.ostermann@uib.no)

9

Alexander Sauter<sup>1,2</sup>, [asauter@fhs.mil.no](mailto:asauter@fhs.mil.no)

10

Ying Xue<sup>1</sup>, [ying.xue@uib.no](mailto:ying.xue@uib.no)

11

Eivind Birkeland<sup>1,3</sup>, [eiv.birk@gmail.com](mailto:eiv.birk@gmail.com)

12

Julia Schoelermann<sup>1,4</sup>, [julia.schoelermann@gmail.com](mailto:julia.schoelermann@gmail.com)

13

Bodil Holst<sup>5</sup>, [bodil.holst@uib.no](mailto:bodil.holst@uib.no)

14

\*Mihaela Roxana Cimpan<sup>1</sup>, [mihaela.cimpan@uib.no](mailto:mihaela.cimpan@uib.no)

15

16

17

\*Correspondence: [mihaela.cimpan@uib.no](mailto:mihaela.cimpan@uib.no)

18

<sup>1</sup>Department of Clinical Dentistry, University of Bergen, Norway.

19

<sup>2</sup>Present address: Royal Norwegian Naval Academy, Bergen, Norway.

20

<sup>3</sup>Present address: Institute for Biochemistry, ETH Zürich, Switzerland.

21

<sup>4</sup>Present address: BerGenBio ASA, Bergen, Norway.

22

<sup>5</sup>Department of Physics and Technology, University of Bergen, Norway.

23

24

25 **Table S1: Physicochemical properties of NMs in 0.05 % w/v BSA-water (stock**  
26 **solution) and complete cell culture medium (exposure medium).** Abbreviations:  
27 DLS – Dynamic Light Scattering, PDI – Polydispersity index, ELS – Electrophoretic  
28 light scattering, TEM – Transmission Electron Microscopy,  $\rho_{\text{NM}}$  – Density of raw  
29 NMs, SF – Stacking Factor, and  $\rho_{\text{EV}}$  – Effective density estimated by volumetric  
30 centrifugation (measurements were performed at least in duplicates / triplicates).

31 <sup>a</sup> Measurement of particle clusters.

32 **Table S2: Overview of physicochemical properties of NMs.** Abbreviations: XRD -  
33 X-ray Diffraction, EDS - Energy-dispersive X-ray spectroscopy, TEM - Transmission  
34 Electron Microscopy, BET - Brunauer–Emmett–Teller theory for specific surface  
35 area, DLS - Dynamic Light Scattering, ICP-OES - Inductively Coupled Plasma  
36 Optical Emission Spectrometry, PDI – Polydispersity index, ISP – isoelectric point,  
37 BSA – Bovine serum albumin, PBS – Phosphate-buffered saline, ppm – parts per  
38 million. Data was collected from the following references: JRC reports <sup>21–24</sup> and  
39 NANoREG technical data sheets <sup>39–45</sup>.

40 **Figure S1: Intensity-based size distributions.** Individual repeats ( $n > 3$ ) of NM  
41 stock dispersions in 0.05 % w/v BSA-water. Each size spectra is the average of ten  
42 individual DLS measurements  $\pm$  SE conducted using automatic optimization. (a) NM-  
43 100 (TiO<sub>2</sub>), (b) NM-101 (TiO<sub>2</sub>), (c) NM-200 (SiO<sub>2</sub>), (d) NM-203 (SiO<sub>2</sub>), (e) NM-110  
44 (ZnO), (f) NM-111 (ZnO), (g) NM-300K (Ag), and (h) NM-302 (Ag-rods).

45 **Figure S2: Transmission electron micrographs of NMs dispersed in 0.05 % w/v**  
46 **BSA-water.** Morphology of (a) NM-100 (TiO<sub>2</sub>), (b) NM-101 (TiO<sub>2</sub>), (c) NM-200 (SiO<sub>2</sub>),  
47 (d) NM-203 (SiO<sub>2</sub>), (e) NM-110 (ZnO), (f) NM-111 (ZnO), (g) NM-300K (Ag), and (h)  
48 NM-302 (Ag-rods) (scale bar: 200 nm).

49 **Figure S4: Representative flow cytometry dot plots for Annexin-V eFluor450**  
50 **and 7-AAD staining.** To check for NM-induced interferences, 100  $\mu\text{g}/\text{mL}$  NM-100  
51 TiO<sub>2</sub> particles were added prior to treatment of U937 cells with TNF- $\alpha$  / CHX (positive  
52 control for apoptosis) and to heating cells at 70°C for 30 min (positive control for  
53 necrosis). Annexin-V eFluor 450 and 7-AAD staining were used to detect apoptotic  
54 and necrotic cells. The addition of NM-100 prior to TNF-  $\alpha$  /CHX treated cells resulted  
55 in an overestimation of viable (Annexin V- / 7-AAD-) cells as compared to cells  
56 treated only with TNF-  $\alpha$  / CHX. The Annexin V- population increased when NM-100  
57 were added prior to cell heating.

58 **Figure S5: Transmission electron micrographs of U937 cells.** (a) Viable  
59 (untreated) cells and (b) after TNF- $\alpha$  / CHX treatment. Scale bar = 10  $\mu\text{m}$ . (TEM  
60 image by CI Vamanu, published with permission).

**Table S1 Physicochemical properties of NMs in 0.05 % w/v BSA-water (stock solution) and complete cell culture medium (exposure medium).**

| Sample                          | Mean hydrodynamic diameter $\pm$ S.E. [nm] (DLS) | PDI $\pm$ S.E.            | Zeta potential $\pm$ S.E. [mV] (ELS) | Mean particle size $\pm$ S.E. [nm] (n>28) (TEM) | $\rho_{\text{NM}}$ (g/cm <sup>3</sup> ) | SF    | $\rho_{\text{EV}}$ $\pm$ S.E. (g/cm <sup>3</sup> ) |
|---------------------------------|--------------------------------------------------|---------------------------|--------------------------------------|-------------------------------------------------|-----------------------------------------|-------|----------------------------------------------------|
| <b>NM-100 (TiO<sub>2</sub>)</b> |                                                  |                           |                                      |                                                 |                                         |       |                                                    |
| 0.05 % w/v BSA-water (Supplier) | 249.6 $\pm$ 2.2 (230)                            | 0.169 $\pm$ 0.003 (0.187) | 0.1 $\pm$ 0.1                        | 141 $\pm$ 4                                     |                                         |       |                                                    |
| DMEM/10% FBS, t 0 hrs           | 303.2 $\pm$ 7.9                                  | 0.166 $\pm$ 0.020         | -9.5 $\pm$ 0.1                       |                                                 |                                         |       |                                                    |
| DMEM/10% FBS, t 24 hrs          | 294.6 $\pm$ 0.7                                  | 0.148 $\pm$ 0.023         | -9.5 $\pm$ 0.1                       |                                                 | 4.23                                    | 0.634 | 1.844 $\pm$ 0.152                                  |
| <b>NM-101 (TiO<sub>2</sub>)</b> |                                                  |                           |                                      |                                                 |                                         |       |                                                    |
| 0.05 % w/v BSA-water (Supplier) | 478.6 $\pm$ 4.1 (423)                            | 0.334 $\pm$ 0.008 (0.275) | -2.2 $\pm$ 0.3                       | 71 $\pm$ 4 <sup>b</sup>                         |                                         |       |                                                    |
| DMEM/10% FBS, t 0 hrs           | 522.3 $\pm$ 14.3                                 | 0.364 $\pm$ 0.015         | -9.7 $\pm$ 0.2                       |                                                 |                                         |       |                                                    |
| DMEM/10% FBS, t 24 hrs          | 368.7 $\pm$ 10.5                                 | 0.346 $\pm$ 0.015         | -9.9 $\pm$ 0.1                       |                                                 | 4.23                                    | 0.634 | 1.554 $\pm$ 0.041                                  |
| <b>NM-110 (ZnO)</b>             |                                                  |                           |                                      |                                                 |                                         |       |                                                    |
| 0.05 % w/v BSA-water (Supplier) | 233.9 $\pm$ 0.6 (233)                            | 0.111 $\pm$ 0.002 (0.110) | -13.2 $\pm$ 0.3                      | 107 $\pm$ 5                                     |                                         |       |                                                    |
| DMEM/10% FBS, t 0 hrs           | 255.0 $\pm$ 1.8                                  | 0.123 $\pm$ 0.013         | -11.7 $\pm$ 0.9                      |                                                 |                                         |       |                                                    |
| DMEM/10% FBS, t 24 hrs          | 237.1 $\pm$ 4.9                                  | 0.129 $\pm$ 0.001         | -10.3 $\pm$ 0.3                      |                                                 | 5.61                                    | 0.634 | 1.870 $\pm$ 0.348                                  |
| <b>NM-111 (ZnO)</b>             |                                                  |                           |                                      |                                                 |                                         |       |                                                    |
| 0.05 % w/v BSA-water (Supplier) | 244.3 $\pm$ 1.9 (247)                            | 0.127 $\pm$ 0.004 (0.125) | -12.1 $\pm$ 0.3                      | 80 $\pm$ 7                                      |                                         |       |                                                    |
| DMEM/10% FBS, t 0 hrs           | 237.2 $\pm$ 1.6                                  | 0.166 $\pm$ 0.004         | -10.1 $\pm$ 0.1                      |                                                 |                                         |       |                                                    |
| DMEM/10% FBS, t 24 hrs          | 238.9 $\pm$ 3.4                                  | 0.141 $\pm$ 0.006         | -6.3 $\pm$ 1.6                       |                                                 | 5.61                                    | 0.634 | 1.661 $\pm$ 0.063                                  |

|                                    |                       |                          |             |                       |       |       |               |
|------------------------------------|-----------------------|--------------------------|-------------|-----------------------|-------|-------|---------------|
| <b>NM-200 (SiO<sub>2</sub>)</b>    |                       |                          |             |                       |       |       |               |
| 0.05 % w/v BSA-water<br>(Supplier) | 257.6 ± 8.3<br>(253)  | 0.458 ± 0.017<br>(0.387) | -33.1 ± 2.1 | 169 ± 21 <sup>a</sup> |       |       |               |
| DMEM/10% FBS, t 0 hrs              | 274.8 ± 14.8          | 0.466 ± 0.045            | -7.9 ± 0.6  |                       |       |       |               |
| DMEM/10% FBS, t 24 hrs             | 167.0 ± 0.7           | 0.588 ± 0.025            | -8.3 ± 0.7  |                       | 2.65  | 0.634 | 1.231 ± 0.011 |
| <b>NM-203 (SiO<sub>2</sub>)</b>    |                       |                          |             |                       |       |       |               |
| 0.05 % w/v BSA-water<br>(Supplier) | 144.6 ± 1.2<br>(145)  | 0.205 ± 0.010<br>(0.203) | -39.2 ± 1.4 | 128 ± 16 <sup>a</sup> |       |       |               |
| DMEM/10% FBS, t 0 hrs              | 162.5 ± 9.7           | 0.326 ± 0.001            | -8.1 ± 0.1  |                       |       |       |               |
| DMEM/10% FBS, t 24 hrs             | N/A                   | N/A                      | -7.2 ± 0.3  |                       | 2.65  | 0.634 | 1.097 ± 0.008 |
| <b>NM-300K (Ag)</b>                |                       |                          |             |                       |       |       |               |
| 0.05 % w/v BSA-water<br>(Supplier) | 79.8 ± 0.2<br>(87)    | 0.260 ± 0.002<br>(0.259) | -4.5 ± 0.3  | 19 ± 0                |       |       |               |
| DMEM/10% FBS, t 0 hrs              | 110.6 ± 6.9           | 0.369 ± 0.031            | -8.9 ± 0.1  |                       |       |       |               |
| DMEM/10% FBS, t 24 hrs             | 108.4 ± 3.2           | 0.374 ± 0.017            | -9.2 ± 0.6  |                       | 10.49 | 0.634 | 1.889 ± 0.064 |
| <b>NM-302 (Ag-rod)</b>             |                       |                          |             |                       |       |       |               |
| 0.05 % w/v BSA-water<br>(Supplier) | 878.9 ± 88.9<br>(797) | 0.641 ± 0.040<br>(0.527) | -17.3 ± 0.7 | 804 ± 104             |       |       |               |
| DMEM/10% FBS, t 0 hrs              | 1032.5 ± 55.1         | 0.682 ± 0.017            | -8.4 ± 0.9  |                       |       |       |               |
| DMEM/10% FBS, t 24 hrs             | N/A                   | N/A                      | -9.5 ± 0.2  |                       | 10.49 | 0.634 | 1.966 ± 0.095 |

Measurements of the stock dispersion and NMs in complete cell culture medium were performed at least in triplicates and duplicates, respectively. Abbreviations: DLS – Dynamic Light Scattering, PDI – Polydispersity index, ELS – Electrophoretic light scattering, TEM – Transmission Electron Microscopy,  $\rho_{\text{NM}}$  – Density of raw NMs, SF – Stacking Factor, and  $\rho_{\text{EV}}$  – Effective density estimated by volumetric centrifugation.

<sup>a</sup> Measurement of particle clusters.

**Table S2: Overview of physicochemical properties of NMs.**

| Material code | Material         | Polymorph (XRD)             | Chemical composition [wt %] (EDS)                                    | Primary particle size $\pm$ SD or size range [nm] (TEM) | Morphology (TEM)                                                                                                | BET [m <sup>2</sup> /g] | z-Average [nm] and PDI (DLS; 0.05% BSA-water) | Zeta potential $\pm$ SD in PBS [mV] and isoelectric point (ISP) [pH] |
|---------------|------------------|-----------------------------|----------------------------------------------------------------------|---------------------------------------------------------|-----------------------------------------------------------------------------------------------------------------|-------------------------|-----------------------------------------------|----------------------------------------------------------------------|
| NM-100        | TiO <sub>2</sub> | Anatase                     | Ti 58.57, O (calculated) 40.08; traces (ppm) of Si, P, Al, K, Cr, Fe | 100 $\pm$ 57                                            | Primary sub-units are equi-axed. Aggregates/agglomerates are more fractal-like with minor spheroidal particles. | 9 - 10                  | z-Average: 230<br>PDI : 0.187                 | Zeta pot: -50 $\pm$ 10<br>ISP: N/A                                   |
| NM-101        | TiO <sub>2</sub> | Anatase                     | Ti 58.79, O (calculated) 40.35; traces (ppm) of Si, P, Al, S         | 5.5 $\pm$ 0.7                                           | Primary particles more or less euqi-axedor slightly elongated.                                                  | 234 - 316               | z-Average: 449<br>PDI: 0.315                  | Zeta pot: -33 $\pm$ 9<br>ISP: 6                                      |
| NM-110        | ZnO              | Hexagonal zincite structure | Zn 89.90, O 10.01; traces (ppm) of Si, Al, Ca, Ni, Pb, Co (ICP-OES)  | Population 1= 20 - 250<br>Population 2= 50 - 350        | Population 1 = hexagonal, Population 2 = cubic, tetragonal and orthorhombic.                                    | 12 -13                  | z-Average: 233<br>PDI: 0.110                  | Zeta pot: -47 $\pm$ 9<br>ISP: N/A                                    |
| NM-111        | ZnO              | Hexagonal zincite structure | Zn 87.39, O 12.48; taces (ppm) of Ni, Pb, Co, Si, Al, Ca (ICP-OES)   | Population 1= 20 - 200<br>Population 2= 10 - 450        | Polyhedral with variable morphologies: hexagonal, cubic, tetragonal, and orthorhombic.                          | 15-16                   | z-Average: 247<br>PDI: 0.125                  | Zeta pot: -39 $\pm$ 6<br>ISP: N/A                                    |
| NM-200        | SiO <sub>2</sub> | Synthetic amorphous silica  | Si 44.77,O 53.02; traces (ppm) of Fe, K, Mg, Zr, Al, Na, S (ICP-OES) | 14 $\pm$ 7                                              | Sub-units are equi-axed and rounded or slightly elongated (sphericity 0.39).                                    | 189                     | z-Average: 253<br>PDI: 0.387                  | Zeta pot: -48 (milliQ water, pH 7)<br>ISP: < 2                       |
| NM-203        | SiO <sub>2</sub> | Synthetic amorphous silica  | Si 46.32, O 53.21; traces (ppm) of Al, S                             | 13 $\pm$ 6                                              | Sub-units are equi-axed and rounded or slightly elongated (sphericity 0.35).                                    | 204                     | z-Average: 145<br>PDI: 0.203                  | Zeta pot: -46 (milliQ water, pH 6.6)<br>ISP: < 2                     |
| NM-300K       | Ag               | Metallic                    | Ag 99.84, O 0.16                                                     | Majority around 20                                      | Majority is round shaped; others are triangular or trapezium-like.                                              | N/A                     | z-Average: 87<br>PDI: 0.259                   | Zeta pot: -11 $\pm$ 3 (ultrapure water)<br>ISP: N/A                  |
| NM-302        | Ag               | Metallic                    | Ag 100 (EDS)                                                         | Width: 183 $\pm$ 80<br>Length: 2700 $\pm$ 2200          | Fibres, acicular.                                                                                               | N/A                     | z-Average: 665<br>PDI: 0.539                  | N/A                                                                  |

Abbreviations: XRD - X-ray Diffraction, EDS - Energy-dispersive X-ray spectroscopy, TEM - Transmission Electron Microscopy, BET - Brunauer–Emmett–Teller theory for specific surface area, DLS - Dynamic Light Scattering, ICP-OES - Inductively Coupled Plasma Optical Emission Spectrometry, PDI – Polydispersity index, ISP – isoelectric point, BSA – Bovine serum albumin, PBS – Phosphate-buffered saline, ppm – parts per million. Data was collected from the following references: JRC reports [21]–[24] and NANoREG technical data sheets [39–45]. [39] National Research Centre for the Working Environment. Technical data sheet – Material code: NM-101. [http://www.nanoreg-materials.eu/Documentation/NM-101\\_NRG-TDS\\_08.05.15.pdf](http://www.nanoreg-materials.eu/Documentation/NM-101_NRG-TDS_08.05.15.pdf). [40] National Research Centre for the Working Environment. Technical data sheet – Material code: NM-110. [http://www.nanoreg-materials.eu/Documentation/NM-110\\_NRG-TDS\\_08.05.14.pdf](http://www.nanoreg-materials.eu/Documentation/NM-110_NRG-TDS_08.05.14.pdf). [41] National Research Centre for the Working Environment. Technical data sheet – Material code: NM-111. [http://www.nanoreg-materials.eu/Documentation/NM-111\\_NRG-TDS\\_08.05.14.pdf](http://www.nanoreg-materials.eu/Documentation/NM-111_NRG-TDS_08.05.14.pdf). [42] National Research Centre for the Working Environment. Technical data sheet – Material code: NM-200. [http://www.nanoreg-materials.eu/Documentation/NM-200\\_NRG-TDS\\_08.05.15.pdf](http://www.nanoreg-materials.eu/Documentation/NM-200_NRG-TDS_08.05.15.pdf). [43] National Research Centre for the Working Environment. Technical data sheet – Material code: NM-203. Available at: [http://www.nanoreg-materials.eu/Documentation/NM-203\\_NRG-TDS\\_08.05.15.pdf](http://www.nanoreg-materials.eu/Documentation/NM-203_NRG-TDS_08.05.15.pdf). [44] National Research Centre for the Working Environment. Technical data sheet – Material code: NM-300K. [http://www.nanoreg-materials.eu/Documentation/NM-300K\\_NRG-TDS\\_02.02.15.pdf](http://www.nanoreg-materials.eu/Documentation/NM-300K_NRG-TDS_02.02.15.pdf). [45] National Research Centre for the Working Environment. Technical data sheet – Material code: NM-302. [http://www.nanoreg-materials.eu/Documentation/NM-302\\_NRG-TDS\\_02.02.15.pdf](http://www.nanoreg-materials.eu/Documentation/NM-302_NRG-TDS_02.02.15.pdf).

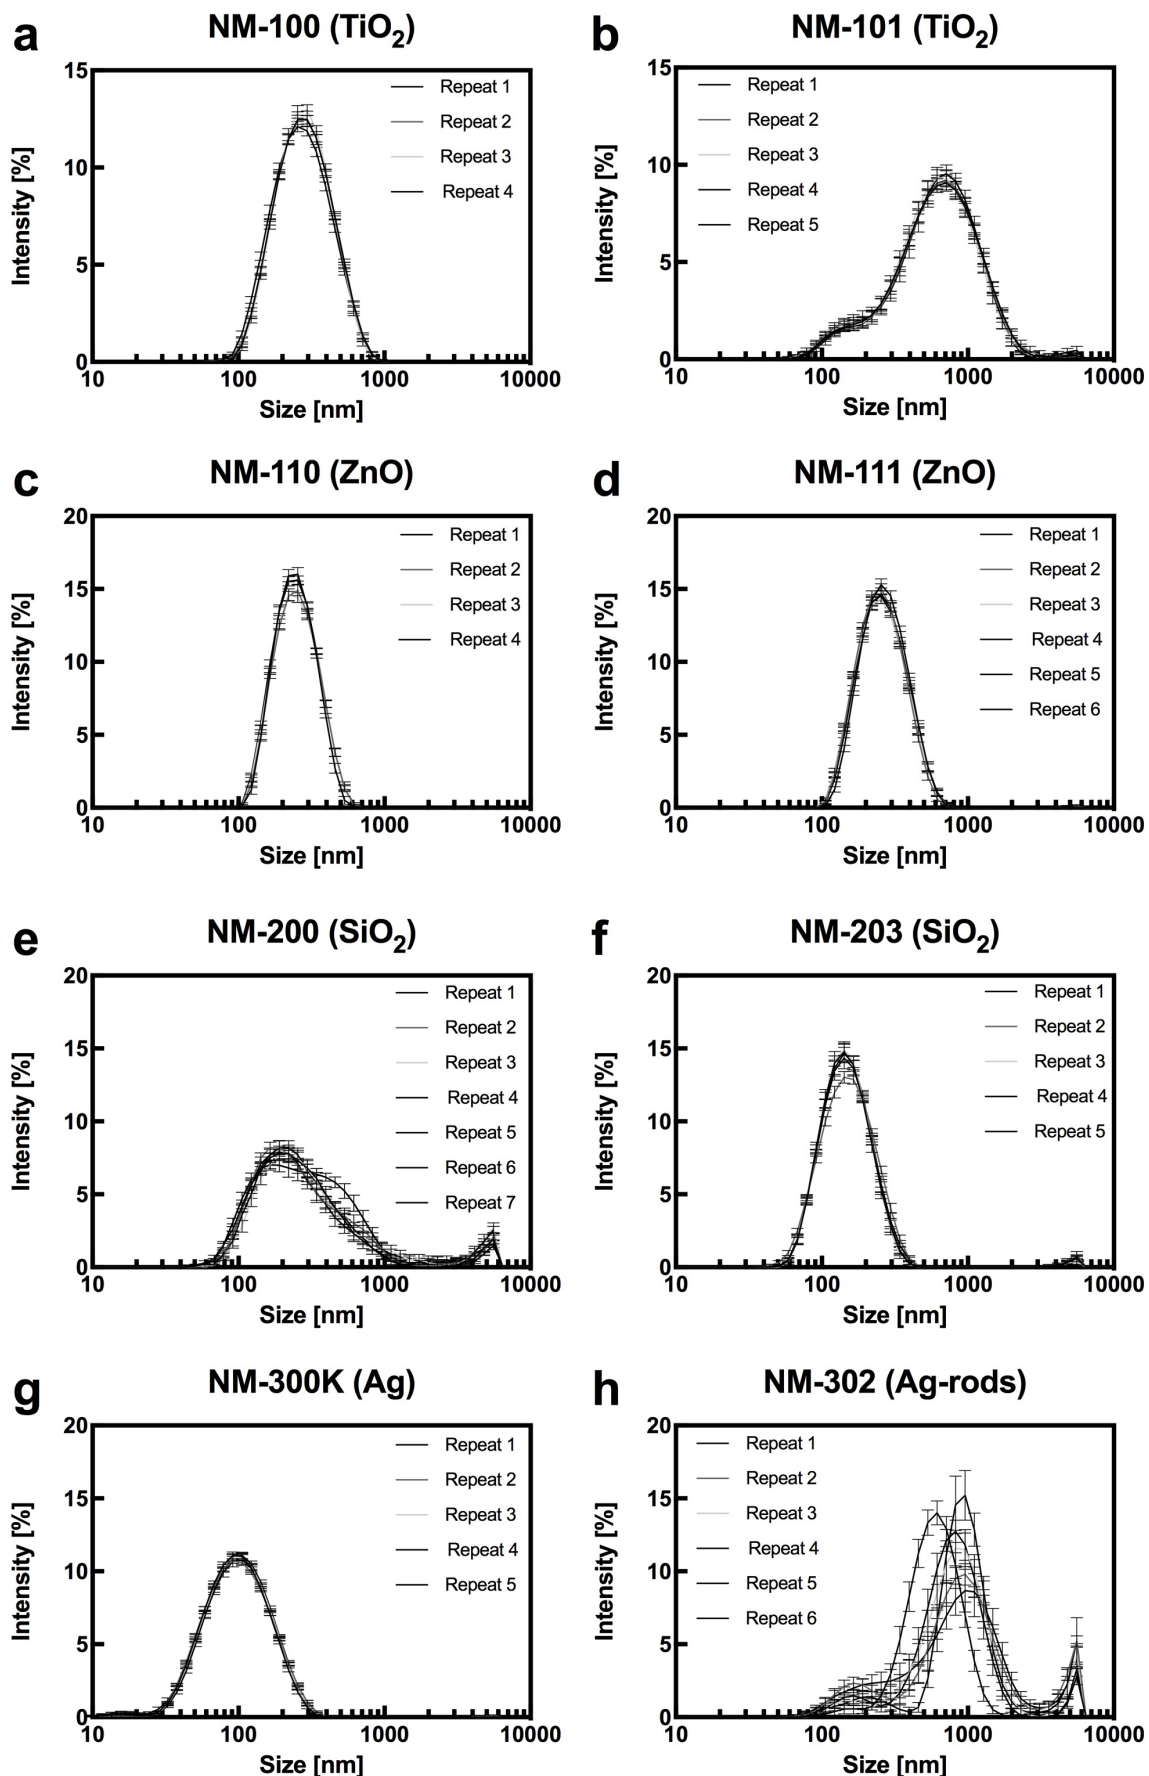

**Figure S1: Intensity-based size distributions.** Individual repeats ( $n > 3$ ) of NM stock dispersions in 0.05 % w/v BSA-water. Each size spectra is the average of ten individual DLS measurements  $\pm$  SE conducted using automatic optimization. (a) NM-100 (TiO<sub>2</sub>), (b) NM-101 (TiO<sub>2</sub>), (c) NM-110 (ZnO), (d) NM-111 (ZnO), (e) NM-200 (SiO<sub>2</sub>), (f) NM-203 (SiO<sub>2</sub>), (g) NM-300K (Ag), and (h) NM-302 (Ag-rods).

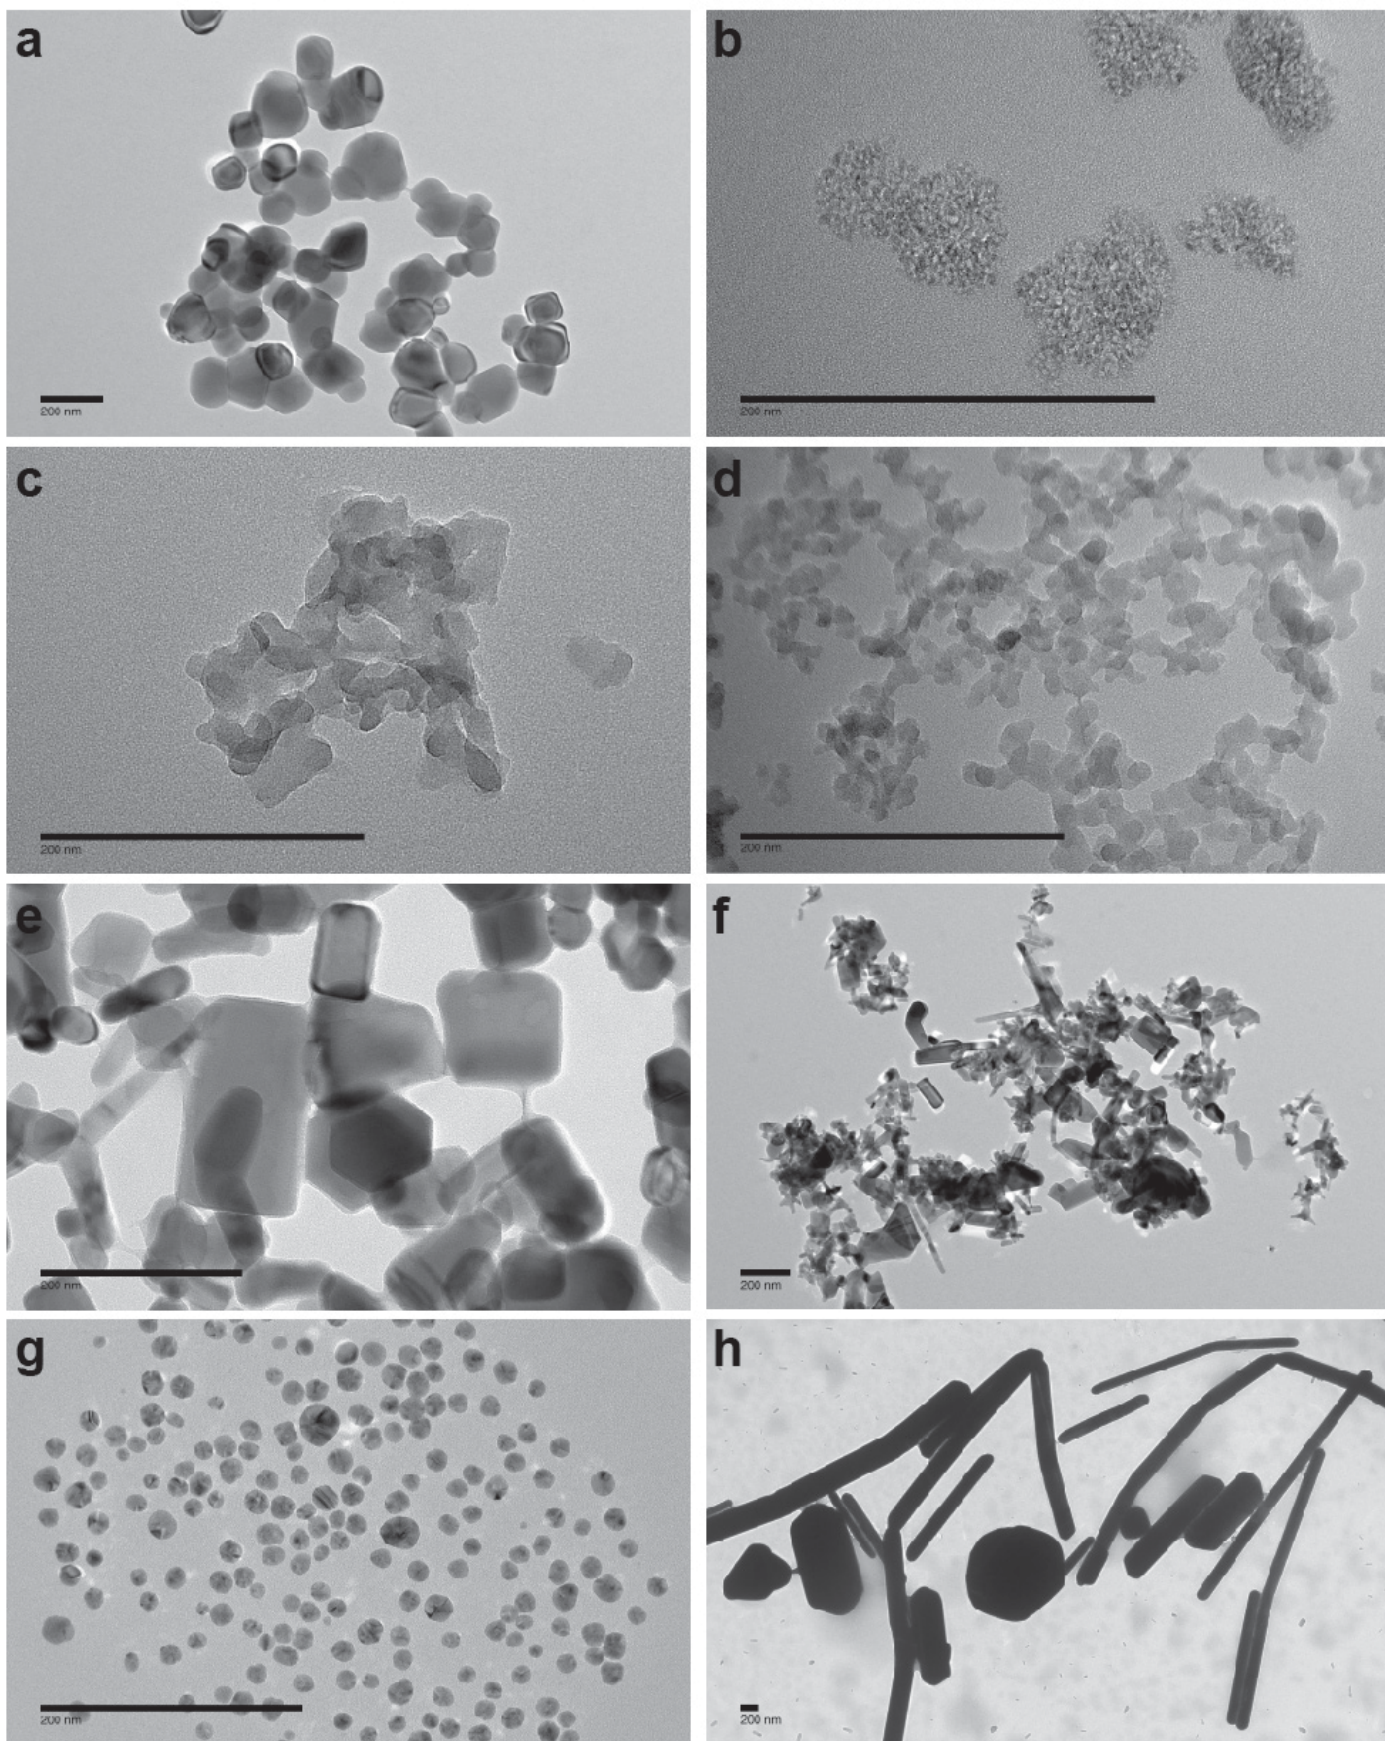

**Figure S2: Transmission electron micrographs of NMs dispersed in 0.05 % w/v BSA-water.** Morphology of **(a)** NM-100 (TiO<sub>2</sub>), **(b)** NM-101 (TiO<sub>2</sub>), **(c)** NM-200 (SiO<sub>2</sub>), **(d)** NM-203 (SiO<sub>2</sub>), **(e)** NM-110 (ZnO), **(f)** NM-111 (ZnO), **(g)** NM-300K (Ag), and **(h)** NM-302 (Ag-rods) (scale bar: 200 nm).

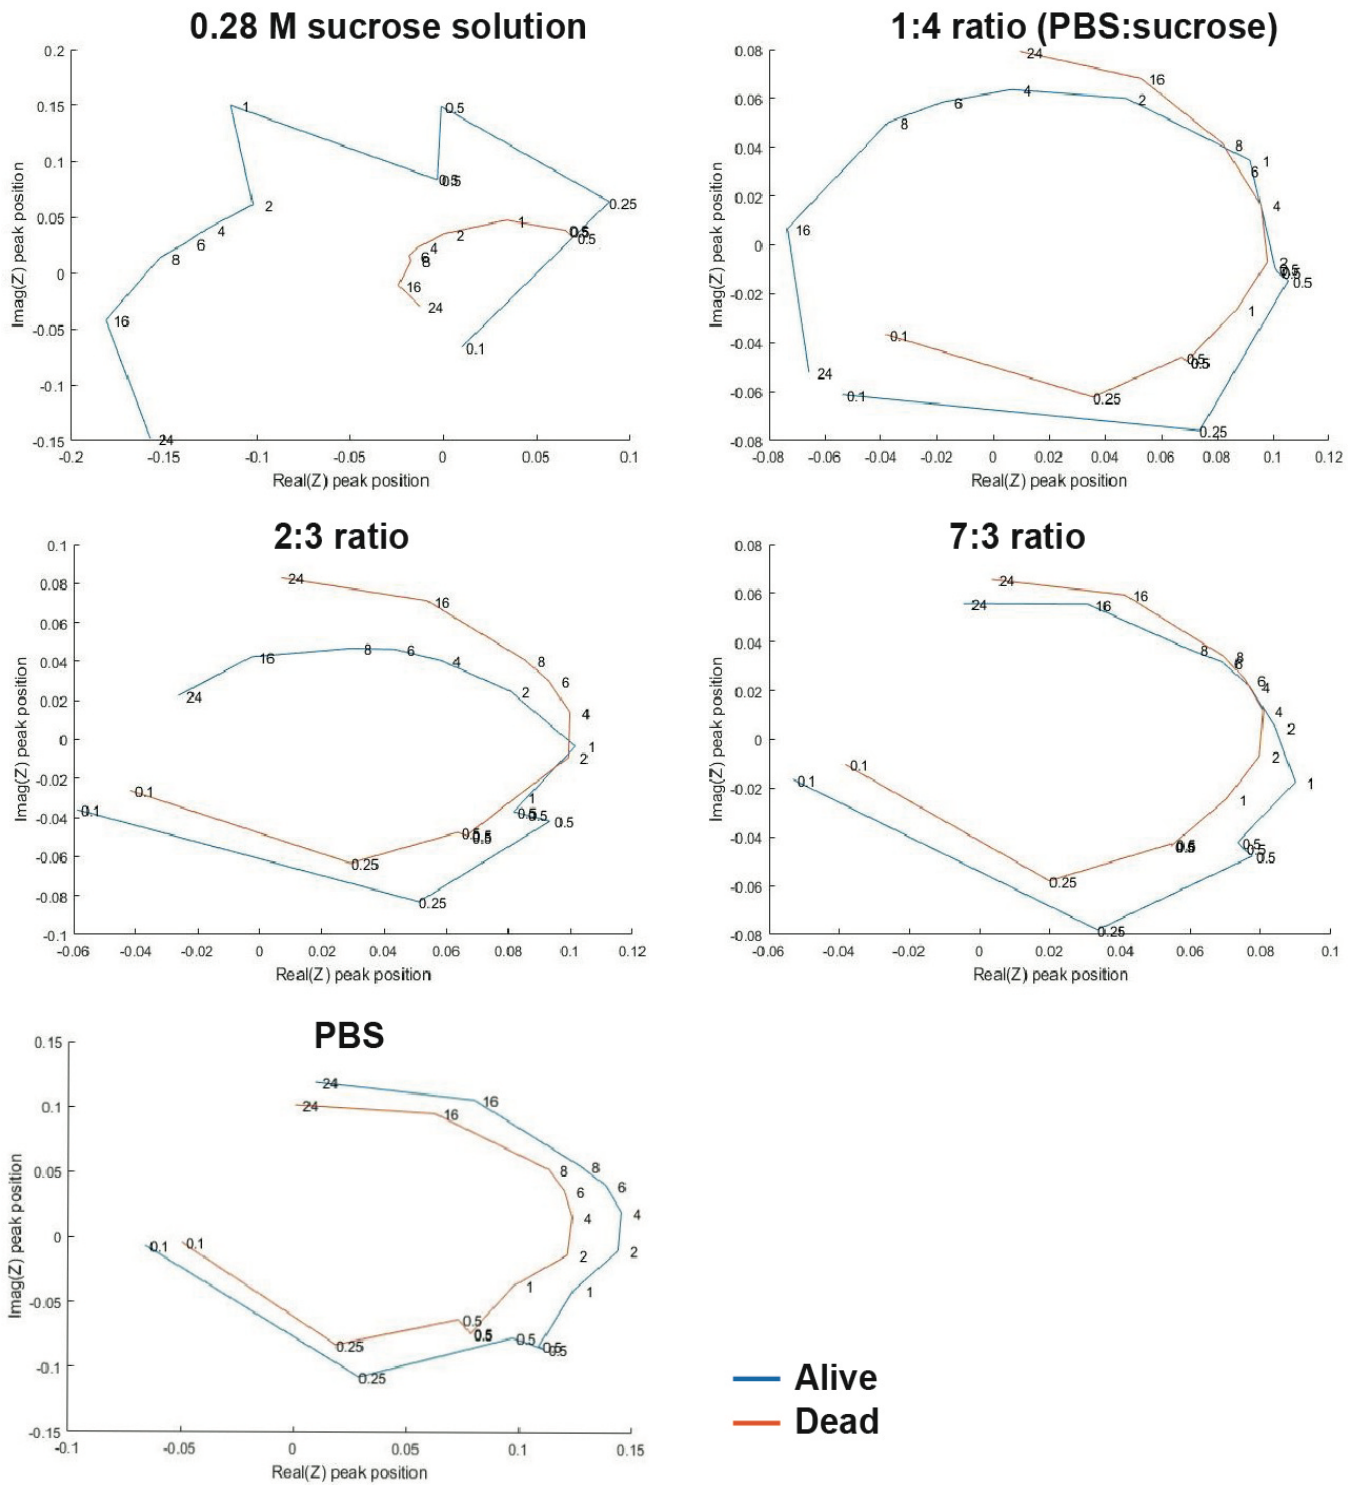

**Figure S3: Impedance measurements of U937 cells using different sucrose-buffer concentrations and various frequencies.** Imaginary (y-axis) and real part of impedance (x-axis) for the peak position (Gaussian approximation centre) were used to determine the sucrose-buffer concentration allowing an optimal differentiation of viable and necrotic cells for a given frequency. Buffer concentrations with ratio 2:3 (PBS : 0.28 M sucrose solution) and higher allows a separation of the two populations with increasing separation in the peak position. At 100% sucrose solution, artefacts appeared.



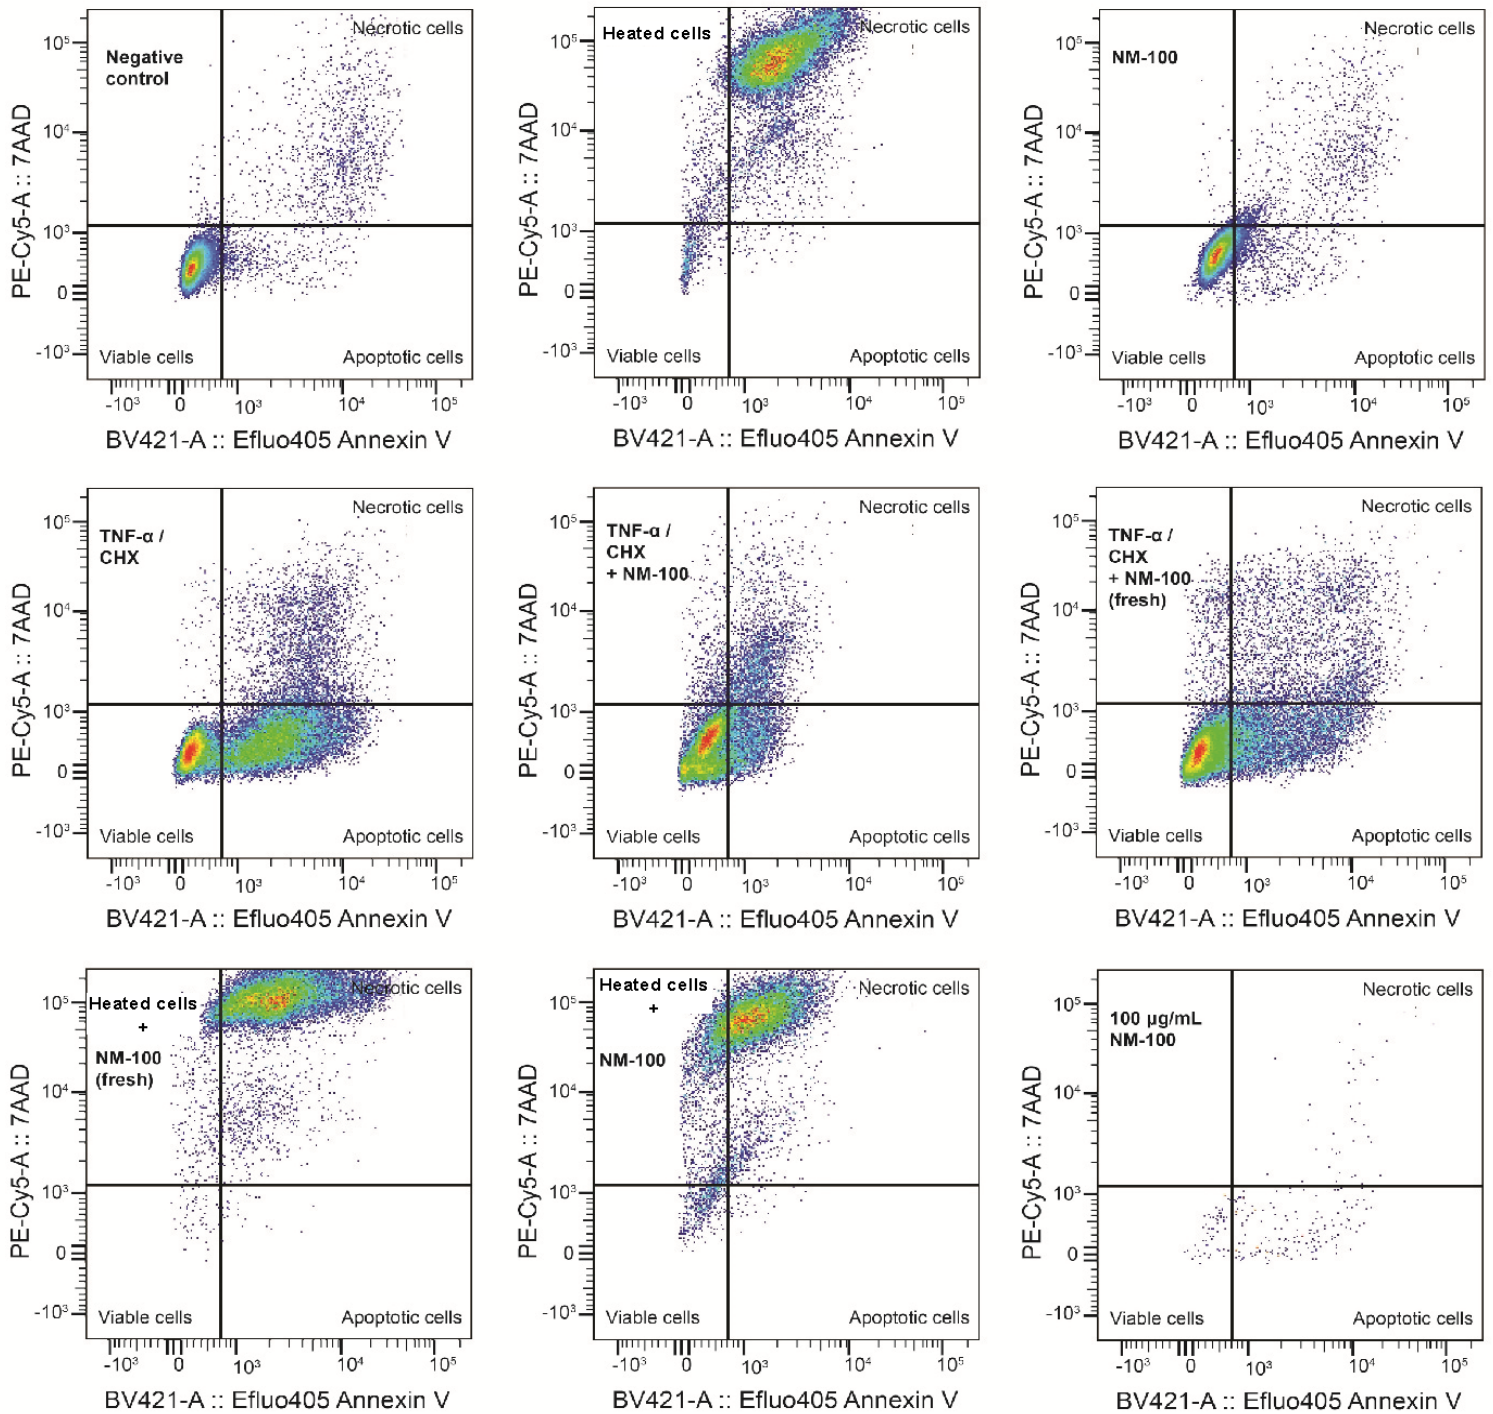

**Figure S4: Representative flow cytometry dot plots for Annexin-V eFluor450 and 7-AAD staining.**

To check for NM-induced interferences, 100  $\mu\text{g}/\text{mL}$  NM-100 TiO<sub>2</sub> particles were added prior to treatment of U937 cells with TNF- $\alpha$  / CHX (positive control for apoptosis) and to heating cells at 70°C for 30 min (positive control for necrosis). Annexin-V eFluor 450 and 7-AAD staining were used to detect apoptotic and necrotic cells. The addition of NM-100 prior to TNF-  $\alpha$  /CHX treated cells resulted in an overestimation of viable (Annexin V- / 7-AAD-) cells as compared to cells treated only with TNF-  $\alpha$  / CHX. The Annexin V- population increased when NM-100 were added prior to cell heating.

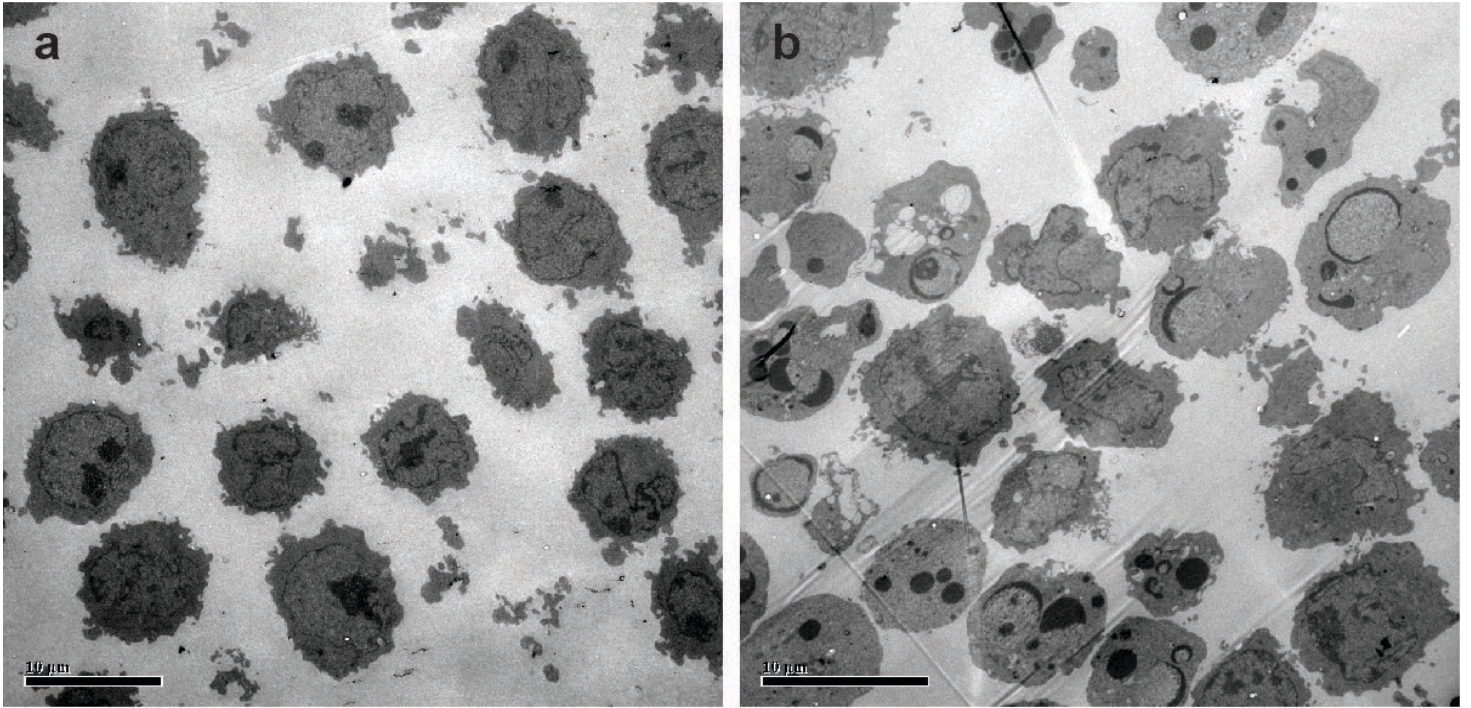

**Figure S5: Transmission electron micrographs of U937 cells. (a) Viable (untreated) cells and (b) after TNF- $\alpha$  / CHX treatment. Scale bar 10  $\mu$ m. (TEM image by CI Vamanu, published with permission).**
